# Supplementary material for: Association of Vitamin E Levels with Metabolic Syndrome, and MRI-Derived Body Fat Volumes and Liver Fat Content
Source: MDPI journal article supplement (doi:10.3390/nu9101143), 2017-10-18
Supplement: s1 [file s1]

## Supplementary Materials

**Table S1.** Missing covariates information.

| Covariate                 | Number of Missing Values |
|---------------------------|--------------------------|
| Cholesterol               | 1                        |
| Physical activity         | 1                        |
| Education (years)         | 1                        |
| Smoking status            | 8                        |
| Vitamin E supplementation | 1                        |

**Table S2.** Odds ratio and 95% Confidence Interval for the association of  $\alpha$ -tocopherol/cholesterol ratio with individual components of MetS.

| Outcome                                                                          | Tertiles (T) of $\alpha$ -Tocopherol/Cholesterol Ratio |                  |                  | P <sub>trend</sub> |
|----------------------------------------------------------------------------------|--------------------------------------------------------|------------------|------------------|--------------------|
|                                                                                  | T1                                                     | T2               | T3               |                    |
| Median $\alpha$ -tocopherol/cholesterol ratio (IQR), $\mu\text{mol}/\text{mmol}$ | 4.63 (4.25–4.88)                                       | 5.53 (5.36–5.72) | 6.74 (6.33–7.59) |                    |
| <b>Hypertension (yes/no) (135/506)</b>                                           | (170/43)                                               | (171/43)         | 165/49)          |                    |
| Model 1                                                                          | Reference                                              | 0.97 (0.59–1.60) | 0.70 (0.42–1.16) | 0.135              |
| Model 2                                                                          | Reference                                              | 0.99 (0.60–1.65) | 0.71 (0.43–1.18) | 0.145              |
| <b>Low HDL-cholesterol (yes/no) (37/604)</b>                                     | (7/206)                                                | (9/205)          | (21/193)         |                    |
| Model 1                                                                          | Reference                                              | 1.16 (0.41–3.25) | 2.38 (0.95–5.99) | 0.034              |
| Model 2                                                                          | Reference                                              | 1.25 (0.43–3.62) | 2.52 (0.97–6.56) | 0.033              |
| <b>Hypertriglyceridemia (yes/no) (279/362)</b>                                   | (29/184)                                               | (29/185)         | (96/118)         |                    |
| Model 1                                                                          | Reference                                              | 0.89 (0.50–1.58) | 3.02 (1.81–5.04) | <0.0001            |
| Model 2                                                                          | Reference                                              | 0.91 (0.51–1.62) | 3.02 (1.80–5.06) | <0.0001            |
| <b>Hyperglycemia (yes/no) (129/512)</b>                                          | (92/121)                                               | (91/123)         | (71/143)         |                    |
| Model 1                                                                          | Reference                                              | 0.99 (0.66–1.48) | 0.97 (0.64–1.48) | 0.888              |
| Model 2                                                                          | Reference                                              | 1.10 (0.72–1.66) | 1.02 (0.67–1.57) | 0.994              |
| <b>Abdominal obesity (yes/no) (468/173)</b>                                      | (148/65)                                               | (161/53)         | (159/55)         |                    |
| Model 1                                                                          | Reference                                              | 1.54 (0.96–2.42) | 1.14 (0.72–1.82) | 0.842              |
| Model 2                                                                          | Reference                                              | 1.42 (0.89–2.27) | 1.13 (0.70–1.83) | 0.834              |

IQR: Interquartile range; MetS: Metabolic syndrome. Model 1: Adjusted for age and sex. Model 2 is model 1 but additionally adjusted for education, physical activity, smoking status, vitamin E supplementation, alcohol intake, and total energy intake.

**Table S3.** Odds ratio and 95% Confidence Interval for the association of  $\gamma$ -tocopherol/cholesterol ratio with individual components of MetS.

| Outcome                                                                          | Tertiles (T) of $\gamma$ -Tocopherol/Cholesterol Ratio |                   |                   | P <sub>trend</sub> |
|----------------------------------------------------------------------------------|--------------------------------------------------------|-------------------|-------------------|--------------------|
|                                                                                  | T1                                                     | T2                | T3                |                    |
| Median $\gamma$ -tocopherol/cholesterol ratio (IQR), $\mu\text{mol}/\text{mmol}$ | 0.16 (0.13–0.18)                                       | 0.24 (0.22–0.26)  | 0.35 (0.31–0.41)  |                    |
| <b>Hypertension (yes/no) (135/506)</b>                                           | (166/47)                                               | (167/47)          | (173/421)         |                    |
| Model 1                                                                          | Reference                                              | 0.97 (0.59–1.57)  | 1.01 (0.61–1.68)  | 0.948              |
| Model 2                                                                          | Reference                                              | 0.92 (0.56–1.53)  | 0.97 (0.58–1.61)  | 0.907              |
| <b>Low HDL-cholesterol (yes/no) (37/604)</b>                                     | (4/209)                                                | (14/200)          | (19/195)          |                    |
| Model 1                                                                          | Reference                                              | 3.58 (1.13–11.33) | 3.63 (1.18–11.15) | 0.045              |
| Model 2                                                                          | Reference                                              | 3.95 (1.14–13.65) | 4.67 (1.42–15.41) | 0.018              |
| <b>Hypertriglyceridemia (yes/no) (279/362)</b>                                   | (33/180)                                               | (37/177)          | (59/155)          |                    |
| Model 1                                                                          | Reference                                              | 0.98 (0.58–1.68)  | 1.65 (0.99–2.73)  | 0.042              |
| Model 2                                                                          | Reference                                              | 1.06 (0.61–1.87)  | 1.81 (1.08–3.06)  | 0.014              |
| <b>Hyperglycemia (yes/no) (129/512)</b>                                          | (89/124)                                               | (86/128)          | (104/110)         |                    |
| Model 1                                                                          | Reference                                              | 0.92 (0.61–1.39)  | 1.25 (0.83–1.89)  | 0.249              |
| Model 2                                                                          | Reference                                              | 0.78 (0.51–1.21)  | 1.14 (0.74–1.75)  | 0.437              |
| <b>Abdominal obesity (yes/no) (468/173)</b>                                      | (141/72)                                               | (159/55)          | (168/46)          |                    |
| Model 1                                                                          | Reference                                              | 1.56 (1.00–2.45)  | 1.69 (1.07–2.69)  | 0.029              |
| Model 2                                                                          | Reference                                              | 1.57 (0.98–2.52)  | 1.59 (0.98–2.58)  | 0.065              |

IQR: Interquartile range; MetS: Metabolic syndrome. Model 1: Adjusted for age and sex. Model 2 is model 1 but additionally adjusted for education, physical activity, smoking status, vitamin E supplementation, alcohol intake, and total energy intake.

**Table S4.** Sensitivity analysis: Multivariable-adjusted means and 95% CI of VAT, SAT and LSI according to tertiles of  $\alpha$ -tocopherol/cholesterol ratio, and scaled by IQR after excluding vitamin E supplement users.

| Outcome                                                                          | Tertiles (T) $\alpha$ -Tocopherol/Cholesterol Ratio |                     |                     | $P_{\text{trend}}$ | $\beta$ Scaled by IQR and 95% CI |
|----------------------------------------------------------------------------------|-----------------------------------------------------|---------------------|---------------------|--------------------|----------------------------------|
|                                                                                  | T1                                                  | T2                  | T3                  |                    |                                  |
| N                                                                                | 184                                                 | 185                 | 177                 |                    |                                  |
| Median $\alpha$ -tocopherol/cholesterol ratio (IQR), $\mu\text{mol}/\text{mmol}$ | 4.59 (4.24–4.83)                                    | 5.52 (5.35–5.71)    | 6.73 (6.35–7.57)    |                    |                                  |
| <b>VAT, <math>\text{dm}^3</math> (<math>n = 546</math>)</b>                      |                                                     |                     |                     |                    |                                  |
| Model 1                                                                          | 3.15 (2.95–3.38)                                    | 3.51 (2.28–3.76)    | 3.51 (3.27–3.76)    | 0.037              | 0.036 (–0.001; 0.074)            |
| Model 2                                                                          | 3.06 (2.86–3.78)                                    | 3.42 (3.20–3.66)    | 3.42 (3.19–3.66)    | 0.026              | 0.037 (0.0004; 0.074)            |
| Model 3                                                                          | 3.18 (3.03–3.33)                                    | 3.44 (3.28–3.60)    | 3.49 (3.33–3.65)    | 0.005              | 0.028 (0.003; 0.053)             |
| <b>SAT, <math>\text{dm}^3</math> (<math>n = 546</math>)</b>                      |                                                     |                     |                     |                    |                                  |
| Model 1                                                                          | 6.07 (5.67–6.50)                                    | 6.68 (6.24–7.16)    | 6.35 (5.92–6.80)    | 0.387              | 0.024 (–0.013; 0.062)            |
| Model 2                                                                          | 5.95 (5.55–6.38)                                    | 6.49 (6.07–6.94)    | 6.20 (5.79–6.64)    | 0.423              | 0.024 (–0.012; 0.061)            |
| Model 3                                                                          | 6.21 (5.97–6.46)                                    | 6.53 (6.29–6.78)    | 6.34 (6.10–6.59)    | 0.421              | 0.014 (–0.006; 0.035)            |
| N                                                                                | 175                                                 | 183                 | 170                 |                    |                                  |
| Median $\alpha$ -tocopherol/cholesterol ratio (IQR), $\mu\text{mol}/\text{mmol}$ | 4.59 (4.24–4.86)                                    | 5.53 (5.35–5.73)    | 6.72 (6.29–7.48)    |                    |                                  |
| <b>LSI (<math>n = 528</math>)</b>                                                |                                                     |                     |                     |                    |                                  |
| Model 1                                                                          | 18.64 (17.42–19.92)                                 | 18.79 (17.59–20.07) | 18.83 (17.59–20.17) | 0.825              | 0.003 (–0.023; 0.049)            |
| Model 2                                                                          | 18.44 (17.24–19.84)                                 | 18.45 (17.25–19.73) | 18.52 (17.26–19.87) | 0.976              | 0.010 (–0.026; 0.046)            |

VAT: Visceral adipose tissue; SAT: Subcutaneous adipose tissue; LSI: Liver signal intensity; BMI: Body mass index; IQR: Interquartile range; CI: Confidence Interval. Model 1: Adjusted for age and sex. Model 2 is model 1 but additionally adjusted for education, physical activity, smoking status, alcohol intake, and total energy intake. Model 3 is model 2 but additionally adjusted for BMI.

**Table S5.** Sensitivity analysis: Multivariable-adjusted means and 95% CI of VAT, SAT and LSI according to tertiles of  $\gamma$ -tocopherol/cholesterol ratio, and scaled by IQR after excluding vitamin E supplement users.

| Outcome                                                                          | Tertiles (T) $\gamma$ -Tocopherol/Cholesterol Ratio |                     |                     | $P_{\text{trend}}$ | $\beta$ Scaled by IQR and 95% CI |
|----------------------------------------------------------------------------------|-----------------------------------------------------|---------------------|---------------------|--------------------|----------------------------------|
|                                                                                  | T1                                                  | T2                  | T3                  |                    |                                  |
| N                                                                                | 167                                                 | 193                 | 186                 |                    |                                  |
| Median $\gamma$ -tocopherol/cholesterol ratio (IQR), $\mu\text{mol}/\text{mmol}$ | 0.16 (0.13–0.18)                                    | 0.24 (0.22–0.26)    | 0.34 (0.31–0.41)    |                    |                                  |
| <b>VAT, <math>\text{dm}^3</math> (<math>n = 546</math>)</b>                      |                                                     |                     |                     |                    |                                  |
| Model 1                                                                          | 3.07 (2.87–3.29)                                    | 3.40 (3.18–3.64)    | 3.71 (3.47–3.98)    | 0.0001             | 0.079 (0.038; 0.120)             |
| Model 2                                                                          | 3.03 (2.83–3.24)                                    | 3.32 (3.10–3.55)    | 3.59 (3.36–3.85)    | 0.0004             | 0.072 (0.032; 0.112)             |
| Model 3                                                                          | 3.25 (3.11–3.41)                                    | 3.31 (3.16–3.47)    | 3.55 (3.39–3.72)    | 0.0072             | 0.0395 (0.012; 0.066)            |
| <b>SAT, <math>\text{dm}^3</math> (<math>n = 546</math>)</b>                      |                                                     |                     |                     |                    |                                  |
| Model 1                                                                          | 5.75 (5.37–6.15)                                    | 6.26 (5.85–6.70)    | 6.58 (6.15–7.04)    | 0.004              | 0.065 (0.024; 0.106)             |
| Model 2                                                                          | 5.82 (5.44–6.22)                                    | 6.35 (5.93–6.80)    | 6.53 (6.10–7.00)    | 0.011              | 0.055 (0.015; 0.095)             |
| Model 3                                                                          | 6.31 (6.08–6.56)                                    | 6.34 (6.10–6.58)    | 6.45 (6.20–7.00)    | 0.290              | 0.017 (–0.006; 0.040)            |
| N                                                                                | 164                                                 | 185                 | 179                 |                    |                                  |
| Median $\gamma$ -tocopherol/cholesterol ratio (IQR), $\mu\text{mol}/\text{mmol}$ | 0.16 (0.13–0.18)                                    | 0.24 (0.22–0.26)    | 0.34 (0.31–0.42)    |                    |                                  |
| <b>LSI (<math>n = 528</math>)</b>                                                |                                                     |                     |                     |                    |                                  |
| Model 1                                                                          | 17.73 (16.55–19.00)                                 | 18.99 (17.79–20.26) | 19.49 (18.24–20.83) | 0.053              | 0.023 (–0.018; 0.064)            |
| Model 2                                                                          | 17.72 (16.52–19.00)                                 | 18.86 (17.64–20.17) | 19.20 (17.93–20.57) | 0.096              | 0.018 (–0.022; 0.059)            |

VAT: Visceral adipose tissue; SAT: Subcutaneous adipose tissue; LSI: Liver signal intensity; BMI: Body mass index; IQR: Interquartile range; CI: Confidence Interval. Model 1: Adjusted for age and sex. Model 2 is model 1 but additionally adjusted for education, physical activity, smoking status, alcohol intake, and total energy intake. Model 3 is model 2 but additionally adjusted for BMI.

**Table S6.** Sensitivity analysis: Odds ratio and 95% Confidence Interval for the association of  $\alpha$ - and  $\gamma$ -tocopherol/cholesterol ratio with MetS and FLD after excluding vitamin E supplement users.

| Outcome                                                                          | Tertiles (T) of $\alpha$ -Tocopherol/Cholesterol Ratio |                  |                  | $P_{\text{trend}}$ |
|----------------------------------------------------------------------------------|--------------------------------------------------------|------------------|------------------|--------------------|
|                                                                                  | T1                                                     | T2               | T3               |                    |
| Median $\alpha$ -tocopherol/cholesterol ratio (IQR), $\mu\text{mol}/\text{mmol}$ | 4.61 (4.24–4.87)                                       | 5.53 (5.36–5.72) | 6.72 (6.34–7.55) |                    |
| <b>MetS (yes/no) (242/351)</b>                                                   | (74/127)                                               | (74/126)         | (94/98)          |                    |
| Model 1                                                                          | Reference                                              | 1.07 (0.70–1.63) | 1.78 (1.17–2.71) | 0.006              |
| Model 2                                                                          | Reference                                              | 1.15 (0.75–1.76) | 1.84 (1.20–2.82) | 0.004              |

|                                                                                  |                  |                  |                  |                          |
|----------------------------------------------------------------------------------|------------------|------------------|------------------|--------------------------|
| Median $\alpha$ -tocopherol/cholesterol ratio (IQR), $\mu\text{mol}/\text{mmol}$ | 4.59 (4.24–4.86) | 5.53 (5.35–5.73) | 6.72 (6.29–7.48) |                          |
| <b>FLD (yes/no) (206/322)</b>                                                    | (67/108)         | (71/112)         | (68/102)         |                          |
| Model 1                                                                          | Reference        | 1.10 (0.71–1.71) | 1.13 (0.72–1.77) | 0.597                    |
| Model 2                                                                          | Reference        | 1.09 (0.70–1.71) | 1.12 (0.71–1.76) | 0.628                    |
| <b>Teriles (T) of <math>\gamma</math>-tocopherol/cholesterol ratio</b>           |                  |                  |                  |                          |
|                                                                                  | <b>T1</b>        | <b>T2</b>        | <b>T3</b>        | <b>P<sub>trend</sub></b> |
| Median $\gamma$ -tocopherol/cholesterol ratio (IQR), $\mu\text{mol}/\text{mmol}$ | 0.16 (0.13–0.18) | 0.24 (0.22–0.26) | 0.35 (0.31–0.41) |                          |
| <b>MetS (yes/no) (242/351)</b>                                                   | (59/123)         | (87/121)         | (107/96)         |                          |
| Model 1                                                                          | Reference        | 1.60 (1.04–2.47) | 1.99 (1.29–3.06) | 0.002                    |
| Model 2                                                                          | Reference        | 1.55 (1.00–2.41) | 1.94 (1.23–3.00) | 0.004                    |
| Median $\gamma$ -tocopherol/cholesterol ratio (IQR), $\mu\text{mol}/\text{mmol}$ | 0.16 (0.13–0.18) | 0.24 (0.22–0.26) | 0.34 (0.31–0.42) |                          |
| <b>FLD (yes/no) (206/322)</b>                                                    | (61/103)         | (67/118)         | (78/101)         |                          |
| Model 1                                                                          | Reference        | 0.97 (0.62–1.51) | 1.35 (0.87–2.11) | 0.155                    |
| Model 2                                                                          | Reference        | 0.93 (0.59–1.47) | 1.32 (0.84–2.07) | 0.196                    |

IQR: Interquartile range; MetS: Metabolic syndrome; FLD: Fatty liver disease. Model 1: Adjusted for age and sex. Model 2 is model 1 but additionally adjusted for education, physical activity, smoking status, alcohol intake, and total energy intake.
